# Supplementary material
Source: PubMed Central journal article supplement (PMC3868409)
Supplement: Supp_Fig2.pdf [file Supp_Fig2.pdf]

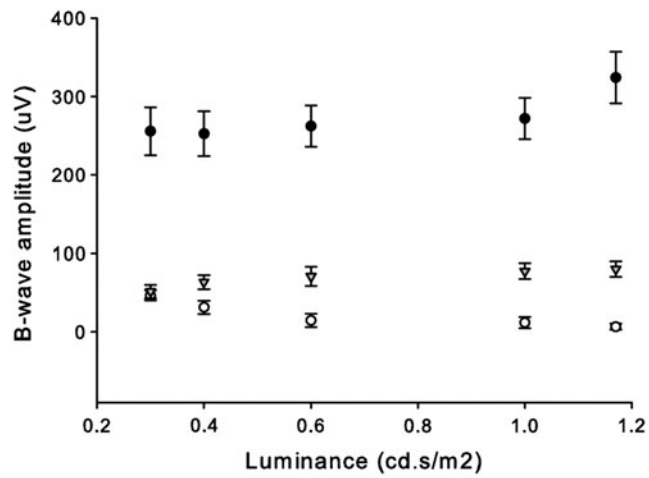

**SUPPLEMENTARY FIG. S2.** Six-hertz flicker in AAV2/8-*GUCY2D*-treated *Gucy2e*<sup>-/-</sup> compared with *Gucy2e*<sup>+/-</sup> eyes. Results are from 1 month postinjection. Black circles are *Gucy2e*<sup>+/-</sup> treated with AAV2/8-*EGFP* or uninjected ( $n=38/38$ ); gray triangles are *Gucy2e*<sup>-/-</sup> treated with AAV2/8-*GUCY2D* ( $n=14/32$ ); white rhombuses are *Gucy2e*<sup>-/-</sup> treated with AAV2/8-*EGFP* or uninjected ( $n=28/28$ ).
